RESEARCH ARTICLE

# Horizontal gene transfer of *Chlamydia*: Novel insights from tree reconciliation

Hyaekang Kim<sup>1</sup>, Woori Kwak<sup>2</sup>, Sook Hee Yoon<sup>1</sup>, Dae-Kyung Kang<sup>3</sup>, Hee-bal Kim<sup>1,2\*</sup>

**1** Department of Agricultural Biotechnology and Research Institute of Agriculture and Life Sciences, Seoul National University, Seoul, Republic of Korea, **2** C&K genomics, Seoul National University Research Park, Seoul, Republic of Korea, **3** Department of Animal Resources Science, Dankook University, Cheonan, Republic of Korea

\* [heebal@snu.ac.kr](mailto:heebal@snu.ac.kr)

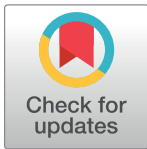

**OPEN ACCESS**

**Citation:** Kim H, Kwak W, Yoon SH, Kang D-K, Kim H (2018) Horizontal gene transfer of *Chlamydia*: Novel insights from tree reconciliation. PLoS ONE 13(4): e0195139. <https://doi.org/10.1371/journal.pone.0195139>

**Editor:** David M. Ojcius, University of the Pacific, UNITED STATES

**Received:** August 2, 2017

**Accepted:** March 16, 2018

**Published:** April 5, 2018

**Copyright:** © 2018 Kim et al. This is an open access article distributed under the terms of the [Creative Commons Attribution License](https://creativecommons.org/licenses/by/4.0/), which permits unrestricted use, distribution, and reproduction in any medium, provided the original author and source are credited.

**Data Availability Statement:** All relevant data are within the paper and its Supporting Information files.

**Funding:** This work was supported by a grant from the NextGeneration BioGreen 21 Program (PJ01115901), Rural Development Administration, Republic of Korea. The funders had no role in study design, data collection and analysis, decision to publish, or preparation of the manuscript.

**Competing interests:** The authors have declared that no competing interests exist.

## Abstract

Recent comparative genomics studies have suggested that horizontal gene transfer (HGT) is one of the major processes in bacterial evolution. In this study, HGT events of 64 *Chlamydia* strains were investigated based on the pipeline employed in HGTTree database constructed in our recent study. Tree reconciliation method was applied in order to calculate feasible HGT events. Following initial detection and an evaluation procedure, evidence of the HGT was identified in 548 gene families including 42 gene families transferred from outside of *Chlamydiae* phylum with high reliability. The donor species of inter-phylum HGT consists of 12 different bacterial and archaeal phyla, suggesting that *Chlamydia* might have even more various host range than in previous reports. In addition, each species of *Chlamydia* showed varying preference towards HGT, and genes engaged in HGT within *Chlamydia* and between other species showed different functional distribution. Also, examination of individual gene flows of niche-specific genes suggested that many of such genes are transferred mainly within *Chlamydia* genus. Our results uncovered novel features of HGT acting on *Chlamydia* genome evolution, and it would be also strong evidence that HGT is an ongoing process for intracellular pathogens. We expect that the results provide more insight into lineage- and niche-specific adaptations regarding their infectivity and pathogenicity.

## Introduction

*Chlamydiae* are a phylum of Gram-negative, obligate intracellular bacteria. They consist of four validly described groups (*Waddila*, *Parachlamydia*, *Simkania*, and *Chlamydiaceae* family) and five additional *Candidatus* families (*Criblamydiaceae*, *Clavichlamydiaceae*, *Piscichlamydiaceae*, *Parilichlamydiaceae*, and *Rhabdochlamydiaceae*) [1]. *Waddila*, *Parachlamydia*, and *Simkania* families have been detected as symbionts of protozoa and emerging pathogens causing infections in humans and animals, and *Chlamydiaceae* family includes 11 species capable of infecting mainly humans and a wide range of animal species [2, 3]. *Chlamydiaceae* family especially has significant impacts on human and animal health worldwide as it is successfully

evolved to inhabit a wide spectrum of eukaryotic hosts, comprising from protozoa to placental mammals. The continuing discovery of new species infecting novel hosts and expanding host ranges of known species indicate importance of niche-specific gene acquisitions in *Chlamydia* [4].

Bacteria exchange their genetic information via horizontal gene transfer (HGT), and it has been considered to be one of a major driving force in the microbial evolution, with gene mutation [5, 6]. While accumulation of mutations is a slower process, HGT have a more substantial and immediate impact on the phenotypes of recipients [7]. Recent studies have also shown that horizontal acquisition of 'pathogenicity islands' directly change the virulent nature of many pathogenic bacteria [8]. HGT is known to occur via three modes: conjugation, transformation, phage-mediated transduction. The exact mechanism of HGT of *Chlamydia* is largely unknown, but previous laboratory works have reported that HGT and subsequent recombination can occur after co-infection within host body [9, 10]. Discovery of a number of phages has shown that phage-mediated transduction in *Chlamydia* is possible as well [11]. Traditionally, due to obligate intracellular nature and low chance of co-infections with more than one strain, however, HGT in *Chlamydia* had been considered unlikely. It has only recently become obvious that *Chlamydia* genomes contain full gene sets necessary for HGT [12]. Additional evidence for the occurrence of HGT was reported from studies on *C. trachomatis* strains in which it was discovered that they actively swap DNA even with strains infecting different parts of the body, and the recombination was not restricted to few "hotspots" [13]. Recent comparative studies detected traces of frequent HGT on several *C. psittaci* genomes as well [14].

Comparative genome analysis in many bacterial and archaeal studies have provided new insights into evolutionary history by exploring remnants of HGT events [15, 16]. In spite of their importance as global infectious diseases and increasing evidences of significant role of HGT, there has been only few exhaustive studies on gene transfer events in different *Chlamydia* species. In this study, we analyzed sets of homologous genes from 64 chlamydial strains from 8 different species and their homologs in 2,407 other prokaryotes using the pipeline employed in our previous study, HGTtree database [17] to initially identify all putative HGT events that occurred within *Chlamydiae* and between *Chlamydiae* and non-chlamydial prokaryotes. HGTtree is a comprehensive resource providing all feasible genome-wide HGT information for completely sequenced genomes of 2,472 prokaryotes (as of 17 March, 2015) by means of phylogenetic tree reconciliation method [17]. It is quite advantageous in inferring tree reconciliation-based HGT information with hundreds of organisms with a reasonable running time. Following initial identification of HGTs in *Chlamydiae*, in order to improve the accuracy of the identification, we additionally evaluated the reliability of each potential candidate HGT events and mapping assignments using RAxML [18] and RANGER-DTL 2.0 software package [19].

Tree reconciliation method is generally considered to be more powerful and sensitive in detecting HGT than distance-based methods [20], but it is computationally intensive and therefore its practical use has remained challenging for analysis of a large number of genomes [17]. Here, we provide extended insight into HGT in the evolution of *Chlamydia* by enabling this massive computation. We identified numerous feasible HGT events that has occurred in evolutionary lineages of *Chlamydia*. Donor organisms external to the *Chlamydiae* phylum were examined to have insights into the ecology of *Chlamydia*. We also examined gene flows of individual genes associated with chlamydia's survival strategies in the host cell. We expect that the results presented in this work could explain how HGT have impact on niche- and lineage-specific evolution of *Chlamydia*.

## Materials and methods

### Chlamydial genomes used in this study

We used 64 completely sequenced chlamydial genomes representing 8 different species from the HGTree database for analysis (all available clinically isolated genomes of *Chlamydia abortus*, *Chlamydia pecorum*, *Chlamydia psittaci*, *Chlamydia caviae*, *Chlamydia pneumoniae*, *Chlamydia felis*, *Chlamydia trachomatis*, *Chlamydia muridarum*). The list of 64 analyzed strains is presented in the [S1 Table](#).

### Identification of putative HGT events

In construction of HGTree [17], 2,472 completely sequenced prokaryotic genomes (156 Archaea and 2,316 Bacteria) were used. A total of 7,748,306 genes were scanned using HMMER (ver. 3.0) (E-value < 10<sup>-3</sup>) [21]. RNAMmer (ver.1.2) was applied to detect 16S rRNA sequences in each genome [22]. In order to predict homologous gene sets, Mestortho orthology detection algorithm (ver.2.0.) was used [23]. Multiple sequence alignments of homologous gene sets and 16S rRNA sequences from corresponding species in the homologs sets were performed using CLUSTAL Omega (ver.1.2.1) [24]. Finally, RANGER-DTL-U software (ver.1.0) was employed to calculate all putative HGT events by reconciliation of the generated gene trees to 16S rRNA species trees. All of the detected HGT events but HGTs between same species were deposited to the database [17]. In this study, an initial screening with HGTree was performed to identify all of the putative HGT events on 64 chlamydial strains, and the candidate HGTs were used for further analysis to evaluate reliability.

### Evaluation of putative HGTs

To obtain HGTs with high reliability, additional analysis was applied following preliminary HGT detection with HGTree. Using RAxML [18], we reconstructed gene trees and species trees of 701 candidate homologs sets with history of HGTs, obtained from HGTree. For each RAxML analysis, we executed 100 rapid bootstrap inferences using GTR+CAT model for 16S rRNA genes and PROTCATJTT model for homologous gene sets. For species trees, 16S rRNA genes only from corresponding species in each set were used. 18S rRNA sequence from *Saccharomyces cerevisiae* was used in each species tree to root, and the sequence was removed using the Newick Utility (ver. 1.6) [25] after the species trees were generated. To evaluate candidate HGTs RANGER-DTL 2.0 [19] was applied. In contrast to RANGER-DTL 1.0, RANGER-DTL 2.0 is capable of sampling the space of all optimal reconciliations uniformly at random and computing multiple optimal reconciliations and accounting for the variability in optimal reconciliation scenarios [19]. Furthermore, to our knowledge, RANGER-DTL 2.0 is by far the only HGT detection program based on the tree reconciliation method that compute support values (SV) for individual DTL event inferences and species mapping assignments. After additional HGT detection with RANGER-DTL 2.0, total 3,004 HGT events in 669 genes were detected, and the average support value were 0.6463. In this study, we used support value cutoff of 0.9 to rule out ambiguous HGTs, and 1,030 HGTs in 548 genes were remained.

### Functional category assignments of transferred genes

Detected genes were assigned to the NCBI clusters of orthologous group (COG) catalogue [26]. COGnizer software was used to examine in which The Kyoto Encyclopedia of Genes and Genomes (KEGG) pathways the transferred genes are associated [27].

## Results & discussion

### Analysis of donor lineages in HGT events

To investigate donor organisms of HGTs of 64 chlamydia strains, we inferred transfer events by reconciling each gene tree of 1,030 homologous gene sets to 2,472 completely sequenced prokaryotic species phylogenies. Following initial identification and evaluation procedure, we detected 1,030 highly reliable HGT events occurred between different species including *Chlamydia* for every gene family. It appeared that HGT has favorably occurred between species in the *Chlamydiae* phylum, but there was also a number of genes derived from organisms outside of the phylum. These organisms belong to 59 different genera, covering 12 bacterial and archaeal phyla which include a wide spectrum of life style (Fig 1). Numerous HGT events were

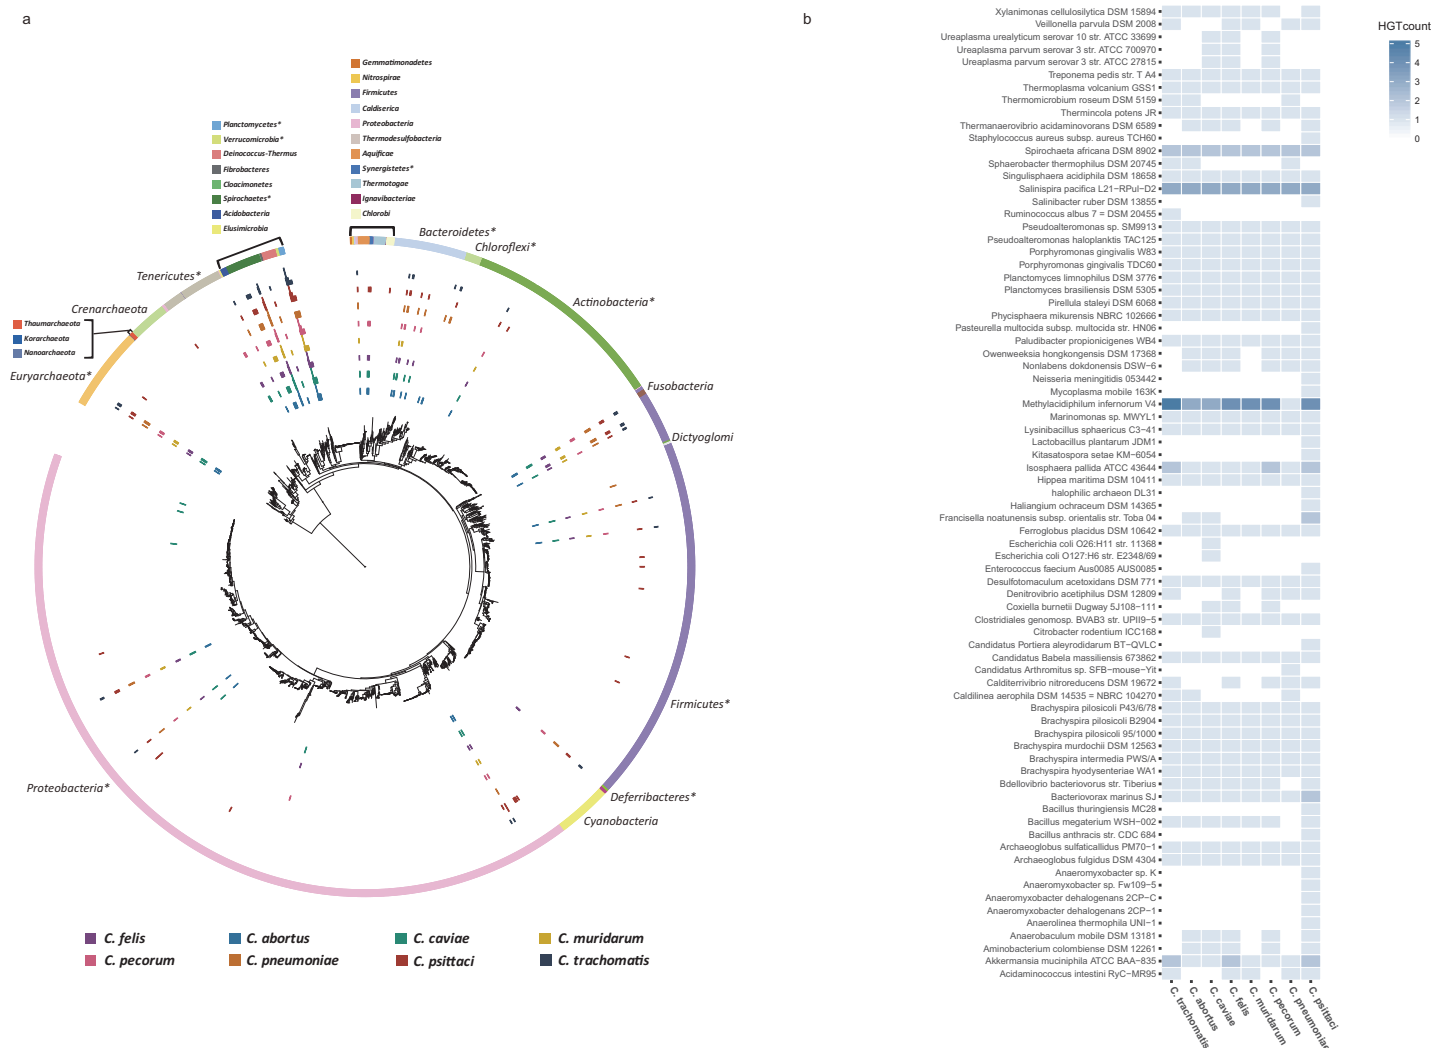

**Fig 1. Donor organisms of HGT of 8 *Chlamydia* species.** (A) This figure illustrates a global pattern of HGT in 8 *Chlamydia* species analyzed. The phylogenetic tree of 2,472 prokaryotic species was constructed with FastTree (ver. 2.9) based on multiple sequence alignment of 16S rRNA. Tree was visualized using Interactive Tree of Life Version 3.4.3 (<http://itol.embl.de/>) [28]. Each colored strip of the outer circle represents different phylum of bacteria and archaea. The actual donor phyla are highlighted with asterisk. From inside out, circled bar charts represent *C. abortus*, *C. caviae*, *C. felis*, *C. muridarum*, *C. pecorum*, *C. pneumoniae*, *C. psittaci*, and *C. trachomatis*, respectively. Each bar chart shows the gene transfers from corresponding organism in the tree, and the vertical bars represent the number of HGT events between corresponding donors and recipient organisms. (B) Heatmap showing the number of HGTs between *Chlamydia* and non-chlamydial donor species. Rows represent all identified donor species (SV  $\geq 0.9$ ); Columns represent recipient *Chlamydia* species. Only HGT events have SV  $\geq 0.9$  are shown here.

<https://doi.org/10.1371/journal.pone.0195139.g001>

subjected to occur between *Chlamydia* and *Proteobacteria*, *Spirochaetes*, whereas *Chlamydia* barely received genes from organisms in *Actinobacteria* phylum. Various species-specific trends of HGT were also observed in each chlamydial species. For example, several species in phylum *Firmicutes* such as *Bacillus anthracis* CDC 684, *Enterococcus faecium* Aus 0085, and *Staphylococcus aureus* subsp. *aureus* TCH60 transferred genes only to *C. psittaci*, and absence of HGT to *C. muridarum* from several donor organisms in *Bacteroidetes* were observed (Fig 1).

Although many of donor organisms such as *Neisseria meningitidis* and *Treponema pedis* are known to be pathogenic to vertebrates or host associated, there exist other donor species which are typically considered as free-living bacteria including *Isophaera pallida* ATCC 43644, *Methylococcus diphilum inferorum* V4, and *Salinispira pacifica* L21-RPU1-D2. First, for the donor species that occupy very similar niches as *Chlamydia*, many organisms residing and causing infections in respiratory system or urogenital organs in human or other animals were identified, in which most of the *Chlamydia* species are associated. Additionally, our result shows an occurrence of several HGTs with commensal organisms isolated from gastrointestinal (GI) tract of mammals. For example, ribose-phosphate pyrophosphokinase gene was transferred from *Ureaplasma parvum* which inhabit genital areas (SV: 1.0), and *Enterococcus faecium* transferred gene encoding ABC transporter family protein to *C. psittaci* (SV: 1.0). In previous study, it was discovered that not only *Chlamydia* can efficiently infect the GI tract of all hosts, including humans, but GI tract can also act as reservoir sites for chlamydial persistent infection [29, 30]. It has been reported that the GI tract is also considered to be a hot spot for HGT among bacteria [31].

In addition to bacteria residing in human or animal body sites, we observed a big proportion of environmental donor species which inhabit aquatic or terrestrial habitats (Fig 1). For instance, Lysyl-tRNA synthetase gene was transferred from aquatic bacteria, *Caldilinea aerophila* (SV: 0.97), and gene encoding MiaB-like tRNA modifying enzyme was transferred from *Thermanaerovibrio acidaminovorans* DSM 6589 residing terrestrial environments (SV: 1.0). The mechanisms by which gene transfer of *Chlamydia* occurring is still unclear. A number of phages required for transduction were discovered and DNA transfers were observed after host co-infection of multiple strains in many studies [9–11]. *Chlamydiae* phylum is considered as a group of successful parasites that have an extremely broad host range and distributed ubiquitous in nature. There have been only four families (*Parachlamydiaceae*, *Simkaniaceae*, *Waddliaceae*, and *Criblamydiaceae*) discovered within the phylum which can grow in natural hosts like amoebae [2]. However, it has been reported in many studies that a large number of rRNA sequence of chlamydia-like organisms are detected in various environmental samples such as soil, water, hot spring, and activated sludge samples [4, 32, 33]. Our results suggest that *Chlamydia* may have even more various host range than we have thought and potentially exchange genes in as yet unknown natural host. It also suggests the hypothesis that there may exist a novel gene transfer mechanism enabling *Chlamydia* to exchange genes with free-living organisms.

### Variation in the effect of HGT between species

Analysis of 64 chlamydial genomes using the HGTtree database identified that 701 gene families were inferred to have undergone one or more HGT, with 97 gene families transferred from outside of *Chlamydiae*. Further examination of the 701 HGT-acquired genes with RAxML and RANGER-DTL 2.0 resulted in 548 putative genes including 42 non-*Chlamydia* originated genes with high reliability. The percentage of received genes was markedly variable across the species, being more than threefold greater in *C. felis* lineage (30.1% of total genes), *C. abortus* lineage (27.4% of total genes), and *C. caviae* lineage (27.1% of total genes) than in *C.*

*trachomatis* (8.15~9.66%) (Fig 2). The great amount of variability in the number of transferred genes between species is derived mainly from intra-phylum transfer events, on the other hands, the ratio of the inter-phylum transferred genes is shown consistently low across all strains. We also looked at the distribution of all detected gene families across COG functional categories [26]. We found that genes from all functional categories (Metabolism, Information

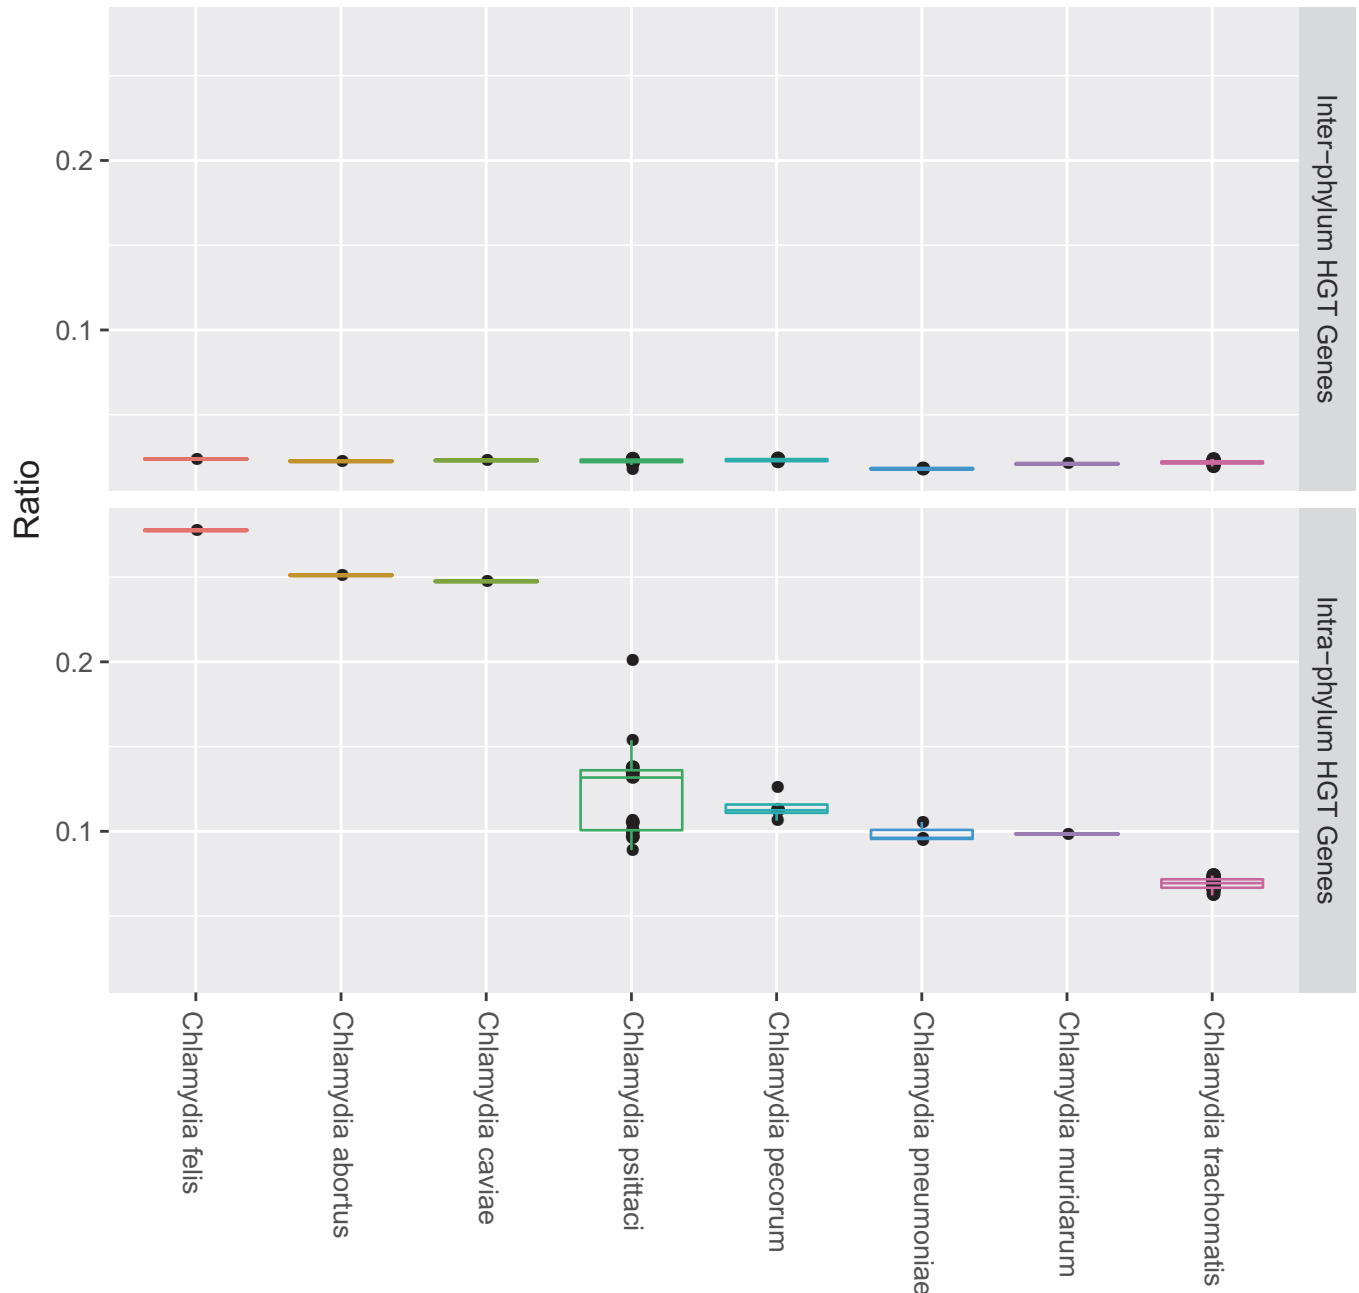

**Fig 2. Distribution of the ratio of transferred genes of 64 chlamydial genomes.** Boxplots show the distribution of the ratio of transferred genes for organisms in each *Chlamydia* species. Each plot shows the distribution of ratios of transferred genes from organisms outside of *Chlamydiae* phylum (Top) and ratios of transferred genes from *Chlamydia* (Bottom). The x-axis indicates of 8 *Chlamydia* species used in this study, and the y-axis indicates ratio of the number of transferred genes in the number of total gene in each strain. The great amount of variability in the number of transferred genes between species is derived mainly from intra-phylum transfer events, on the other hands, the ratio of the inter-phylum transferred genes is shown consistently low across all strains.

<https://doi.org/10.1371/journal.pone.0195139.g002>

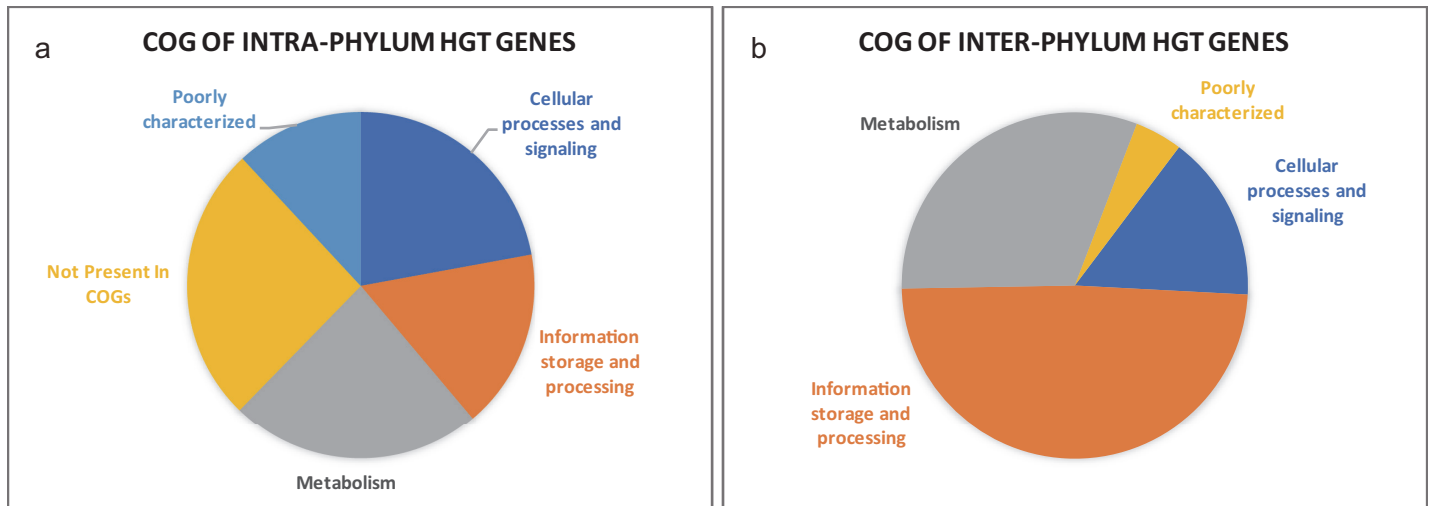

**Fig 3. Distribution of received HGT gene sets across COG functional categories.** The functional categories are according to the COG database [26]. (A) It shows the distribution of genes received from *Chlamydia*. (B) It shows the distribution of received genes from organisms other than *Chlamydiae* phylum. Genes from all functional categories (Cellular processes and signaling, Information storage and processing, and Metabolism) are subject to transfer. In contrast, in inter-phylum transfers, genes related to metabolism, and information storage and processing are assigned relatively high (31% and 49%, respectively), while only 16% of cellular processes and signaling genes are assigned.

<https://doi.org/10.1371/journal.pone.0195139.g003>

storage and processing, and Cellular processes and signaling) are subject to transfer (Fig 3). In contrast, in inter-phylum transfers, genes related to metabolism, and information storage and processing are assigned relatively high (31% and 49%, respectively), while only 16% of cellular processes and signaling genes are assigned (Fig 3). These results indicate that there may exist genetic barriers of inter-phylum HGT in chlamydial genomes. Gene transfer between distantly related organisms is known to occur less frequently than between closely related organisms since genetic mechanisms and different genome organization can act as constraints for inter-phylum HGT [34, 35].

As mentioned above, the *C. felis* and *C. abortus* genome displayed the highest ratio of HGT genes in all the species, with 30.1% and 27.4% of total genes, respectively. *C. abortus* is the most recently diverged species which mainly responsible for enzootic abortion in sheep and cattle [36]. There is a strong correlation between adaptation and HGT. It is known that bacteria can respond to SOS triggered by environmental stress and promote horizontal distribution of essential genes for survival [37]. In a recent study, 190 recombination events were observed in 12 *C. trachomatis* recombinants under antibiotic pressure [38]. It is also reported that mismatch repair gene deficient bacteria have significantly increased the rate of HGT and subsequent recombination of those genes [39]. In this way, HGT can be used to speed up the rates of adaptation in new environments [40], on the other hand, it is kept at a minimal level [41]. Therefore, high ratio of HGT genes of *C. abortus* can be explained as the result of ongoing adaptation to a new pathogenic lifestyle in placenta. In contrast, all of the *C. trachomatis* lineages show relatively low ratios, with an average of 9.08% of genes transferred. Possible explanation for this phenomenon is that *C. trachomatis* has very long evolutionary history since its divergence from the other *Chlamydia* approximately 6 million years ago [42], and unlike other *Chlamydia* that infect across multiple host species with histories of frequent host species jumps [14, 43], *C. trachomatis* has human beings as its exclusive natural host. Nevertheless, they are successfully adapted intracellular pathogens, which infections are among the most common of all human bacterial infections as it is a leading cause of sexually transmitted infection and blindness worldwide [44, 45]. In this point of view, it may be hypothesized that their stability

as well-adapted pathogens in static environments for a long period have made them to keep gene transfers at a minimal level. In addition, the absence of *C. trachomatis* infecting phages detected may have impacts on the low ratio of HGT [11].

KEGG analysis of transferred gene families was performed to investigate pathways that might play important roles in *Chlamydia* and test whether transferred gene sets of each lineage are varied across functional pathways. In our analysis, variation in the number of transferred gene sets between lineages was quite similar across pathways, in most lineages, carbohydrate, nucleotide, and cofactor metabolism exchanged most abundantly (Fig 4). In previous study, frequent exchange of genes in carbohydrate transport and metabolism among animal associated organisms was observed [46]. However, we found that the effect of intra-phylum transfer and inter-phylum transfer on each pathway were different (Fig 5). For instance, genes associated in aminoacyl-tRNA biosynthesis pathway were horizontally acquired mainly from non-chlamydial species, and interestingly, HGT of the genes related to type III secretion system (T3SS) almost exclusively occurred at intra-phylum level (Fig 5). The varying effect on the functional categories and species suggest some pathways may accept the introducing of new genes from different phylum better than other pathways. Not all genes are permissive to inter-specific gene transfer. Genes which encode proteins making up large complexes or genes whose products interact with other particles a lot display less preference towards HGT [47]. In addition, deleterious interaction between native and acquired proteins may be also important barriers [47, 48]. Barriers between certain species have been recognized as well for many bacterial and archaeal species [49].

### HGT of virulence-related genes of *Chlamydia*

Bacterial evolution is largely dependent on the ability to adapt and colonize specific niches. Gene transfers of virulence-related genes may affect the pathogenesis of specific *Chlamydia* strains. Therefore, it is important to identify these events to expand our understanding of speciation event and strain emergence. Although *Chlamydia* have very conserved genomes as a result of genome reduction imposed by their intracellular lifestyle [42], there is a region of hot-spot for genome variation which is termed as “Plasticity zone,” and the region encodes virulence factors including membrane attack complex/perforin protein (MACPF), cytotoxin, and genes related to important biosynthesis and salvage pathways [50]. Presence or absence of these genes in the region are known to confer different niche-specificity to the organisms. Based on our work, there appeared to be several events of HGT in the plasticity zone occurring within *Chlamydia* genus. Since *Chlamydia* interact frequently with membranes during their infection, the role of MACPF is important [51]. We found the gene transfer of MACPF from *C. abortus* S26/3 to *C. felis* Fe/C-56 (SV: 1.0) and to *C. psittaci* M56 (SV: 1.0) separately. The tryptophan biosynthesis pathway is necessary for survival of *Chlamydia* since host restricts chlamydial growth by degrading tryptophan as a defense mechanism [52]. Each *Chlamydia* species possesses different level of functional gene sets of tryptophan biosynthesis pathway [53]. Among the genes associated in this pathway, only *TyrP* gene encoding tyrosine/tryptophan transport protein was transferred within *Chlamydia* genus (from *C. felis* Fe/C-56 to *C. caviae* GPIC; SV: 1.0). However, phylogenetic incongruence suggested that *TrpC* of *C. pecorum* E58, *C. felis* Fe/C-56, and *C. caviae* GPIC were might have been transferred from *Coxiella burnetii* dugway 5J108-111 strain, another obligate intracellular pathogen of humans and animals (SV: 1.0). *TrpC* encodes indole-3-glycerol phosphate synthase which is necessary in the fourth step of tryptophan biosynthesis pathway. It was previously proposed that *Coxiella burnetii* acquired *trp* operon from *simkania negevensis*, a bacterium belonging to the *Chlamydiae* phylum [54]. Putative multiple intra-genus gene transfers were also observed in adenosine



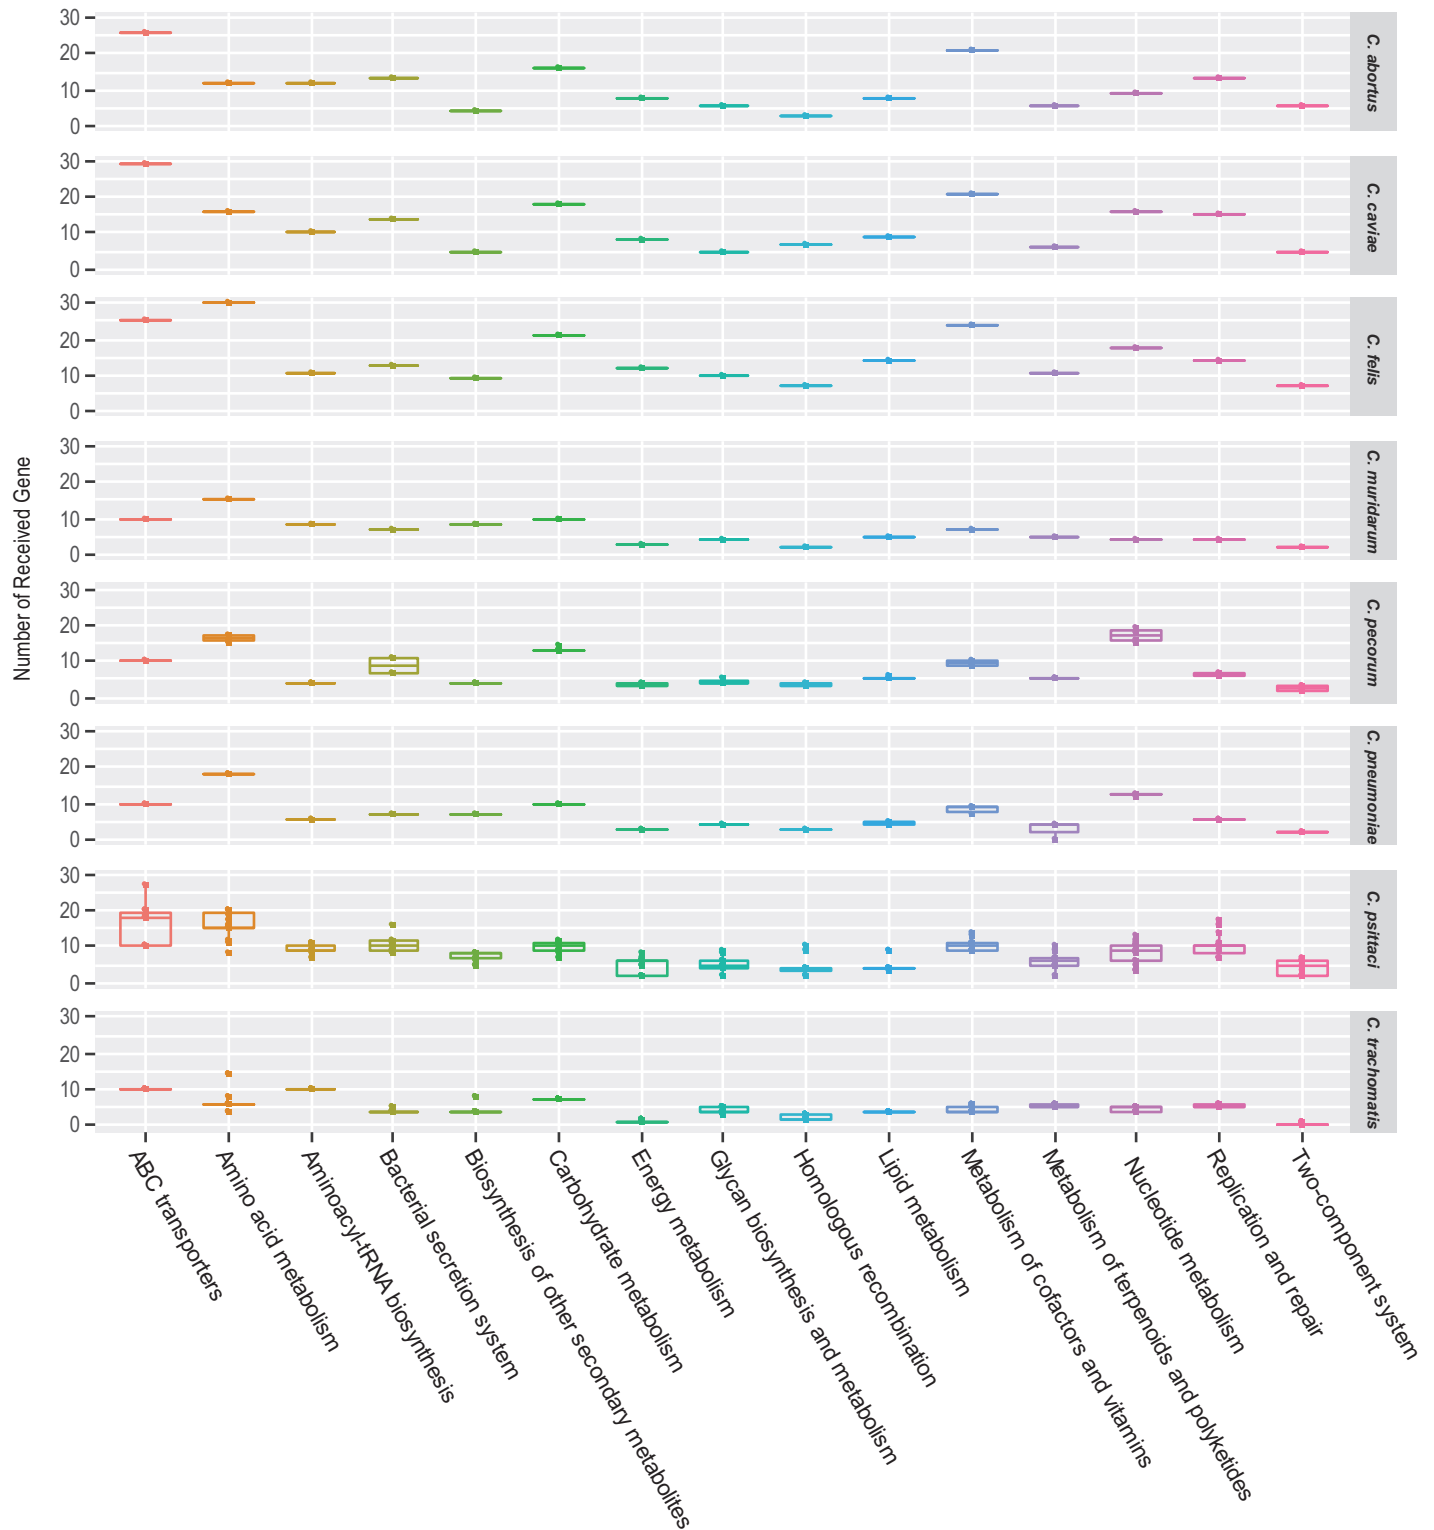

**Fig 4. KEGG pathways of transferred genes of each *Chlamydia* species.** The figure displays variation in the number of transferred gene sets across KEGG Pathways. The Boxplots represent the number of genes associated in corresponding KEGG Pathway transferred to each *Chlamydia* species. Each row denote 8 different *Chlamydia* species used in this study. The y-axis indicates the number of genes transferred counted.

<https://doi.org/10.1371/journal.pone.0195139.g004>

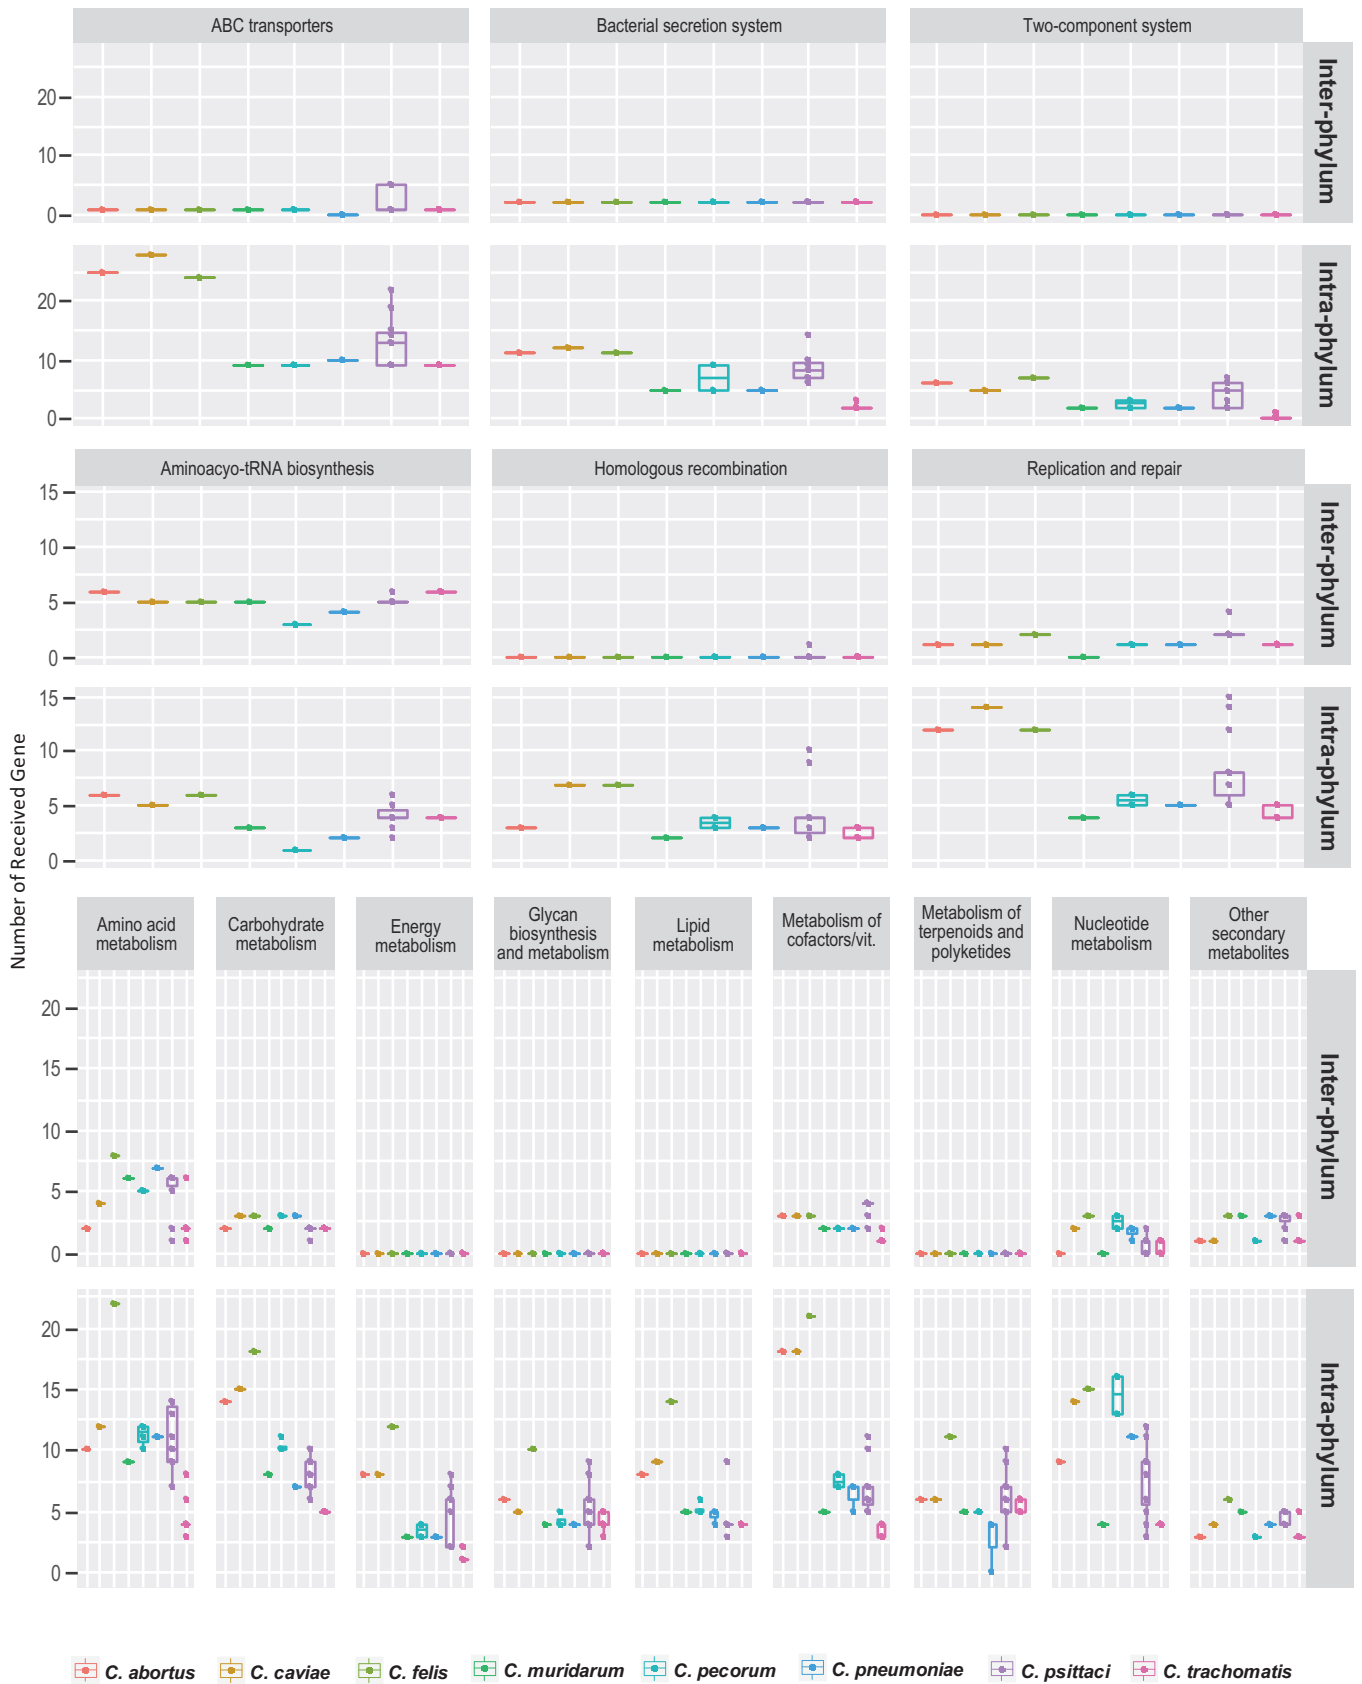

**Fig 5. Distribution of number of the inter- and intra-phylum transferred genes across pathway.** The figure displays variation in the number of transferred gene sets between inter-phylum HGT and intra-phylum HGT. The Boxplots show the number of genes transferred to each *Chlamydia* species distributed across KEGG Pathways. Each row denotes inter- and intra-phylum HGT genes. The y-axis indicates the number of received genes to *Chlamydia* species counted.

<https://doi.org/10.1371/journal.pone.0195139.g005>

deaminase (*Add*) associated in purine ribonucleotide biosynthesis pathway (S1 Fig), although no signs of HGT were detected in *GuaAB*. Presence of *tox/adhesion* may affect *Chlamydia* pathogenesis and host-range. These loci present only in *C. trachomatis*, *C. muridarum*, *C. pecorum*, *C. psittaci*, *C. caviae*, and *C. felis* species. To determine whether strains possessing the locus have gained the gene recently or whether these genes are lost by strains that do not is important [14]. According to our analysis, HGT of *tox/adhesion* had occurred from *Escherichia coli* and *Citrobacter rodentium* to *C. caviae* GPIC (SV: 1.0).

*Chlamydia* displays a unique biphasic developmental cycle. At all stages of infection, interactions between the *Chlamydia* and its host are essential, and they translocate different types of virulence effector proteins into host cytoplasm which are used for manipulation of host cellular functions [55]. Like virulence genes in the plasticity zone, T3SS genes seemed to be mostly transferred within *Chlamydia*. Among the genes encoding structural components of the T3SS apparatus, there were evidences for intra-genus HGT in 5 genes (*SctW*, *SctS*, *SctR*, *SctF*, and *SctP*). Among the effector proteins that are used for manipulation of host cell immune response, *EEA1*, *Cap1*, *CPAF*, *Tsp*, and *pGP6-D* appear to have histories of HGT only with other *Chlamydia*.

HGT among *Chlamydiaceae* has been featured in many comparative genomics studies in recent few years [13, 14, 56]. We have discovered, using a tree reconciliation method, exchanges of virulence related genes are mainly occurred within *Chlamydia* genus. It suggests that intra-genus HGT may have been a major mechanism for the acquisition of determining factors of infection in *Chlamydia*. This discovery reflect that virulence related genes circulate among *Chlamydia* which may facilitate speciation event and new strain emergence. In microbial pathogens, virulence genes are particularly important determinants of host and tissue range [57], and transfer of those genes may provide a fitness benefit to the recipient. Gene acquisition from closely related species which have already adapted to meet the particular requirements of similar niche would confer even more advantages for adaptation. It will be informative to see if intra-genus HGT is a general mechanism for the acquisition of such factors also in other obligate intracellular pathogenesis. In this study, we uncovered several features of HGT acting on *Chlamydia* genome evolution and proposed an expansion of current understanding of *Chlamydia* ecology. More insights into HGT mechanism of *Chlamydia* will come from future laboratory experiments.

## Supporting information

**S1 Fig. Example of phylogenetic incongruence of adenosine deaminase (*Add*) gene.** (A) is the species tree of *Add* gene. (B) is the gene tree of *Add* gene. Phylogenetic difference between the gene tree and the species tree indicate that *Add* gene inferred to have undergone one or more HGT events. The tree reconciliation method detected 3 putative HGT events in *Chlamydia*. The species highlighted with color red indicate the organisms participated in the events. Arrows depict the HGTs between the organisms. Support values are shown near to the corresponding HGTs which indicated by arrows.

(EPS)

**S1 Table. The information of *Chlamydia* strains used in this study.**

(XLSX)

## Author Contributions

**Conceptualization:** Heebal Kim.

**Data curation:** Hyaekang Kim.

**Formal analysis:** Hyaekang Kim.

**Methodology:** Hyaekang Kim, Woori Kwak.

**Project administration:** Heebal Kim.

**Visualization:** Woori Kwak.

**Writing – original draft:** Hyaekang Kim.

**Writing – review & editing:** Woori Kwak, Sook Hee Yoon, Dae-Kyung Kang, Heebal Kim.

## References

1. Gupta RS, Naushad S, Chokshi C, Griffiths E, Adeolu M. A phylogenomic and molecular markers based analysis of the phylum Chlamydiae: proposal to divide the class Chlamydiai into two orders, Chlamydiales and Parachlamydiales ord. nov., and emended description of the class Chlamydiai. *Antonie van Leeuwenhoek*. 2015; 108(3):765–81. <https://doi.org/10.1007/s10482-015-0532-1> PMID: 26179278
2. Collingro A, Tischler P, Weinmaier T, Penz T, Heinz E, Brunham RC, et al. Unity in variety—the pan-genome of the Chlamydiae. *Molecular biology and evolution*. 2011; 28(12):3253–70. Epub 2011/06/22. <https://doi.org/10.1093/molbev/msr161> PMID: 21690563; PubMed Central PMCID: PMC3247790.
3. Horn M. Chlamydiae as symbionts in eukaryotes. *Annu Rev Microbiol*. 2008; 62:113–31. <https://doi.org/10.1146/annurev.micro.62.081307.162818> PMID: 18473699
4. Corsaro D, Valassina M, Venditti D. Increasing diversity within Chlamydiae. *Critical reviews in microbiology*. 2003; 29(1):37–78. <https://doi.org/10.1080/713610404> PMID: 12638718
5. Ochman H, Lawrence JG, Groisman EA. Lateral gene transfer and the nature of bacterial innovation. *Nature*. 2000; 405(6784):299–304. <https://doi.org/10.1038/35012500> PMID: 10830951
6. Koonin EV, Makarova KS, Aravind L. Horizontal gene transfer in prokaryotes: quantification and classification 1. *Annual Reviews in Microbiology*. 2001; 55(1):709–42.
7. Lind PA. *Evolutionary Dynamics of Mutation and Gene Transfer in Bacteria*: Acta Universitatis Upsalensis; 2010.
8. Groisman EA, Ochman H. Pathogenicity islands: bacterial evolution in quantum leaps. *Cell*. 1996; 87(5):791–4. PMID: 8945505
9. Srinivasan T, Bruno WJ, Wan R, Yen A, Duong J, Dean D. In vitro recombinants of antibiotic-resistant *Chlamydia trachomatis* strains have statistically more breakpoints than clinical recombinants for the same sequenced loci and exhibit selection at unexpected loci. *Journal of bacteriology*. 2012; 194(3):617–26. <https://doi.org/10.1128/JB.06268-11> PMID: 22123249
10. DeMars R, Weinfurter J. Interstrain gene transfer in *Chlamydia trachomatis* in vitro: mechanism and significance. *Journal of bacteriology*. 2008; 190(5):1605–14. <https://doi.org/10.1128/JB.01592-07> PMID: 18083799
11. Rosenwald AG, Murray B, Toth T, Madupu R, Kyrillos A, Arora G. Evidence for horizontal gene transfer between *Chlamydophila pneumoniae* and *Chlamydia* phage. *Bacteriophage*. 2014; 4(4):e965076. <https://doi.org/10.4161/21597073.2014.965076> PMID: 26713222
12. Stephens RS, Kalman S, Lammel C, Fan J, Marathe R, Aravind L, et al. Genome sequence of an obligate intracellular pathogen of humans: *Chlamydia trachomatis*. *Science (New York, NY)*. 1998; 282(5389):754–9.
13. Harris SR, Clarke IN, Seth-Smith HM, Solomon AW, Cutcliffe LT, Marsh P, et al. Whole-genome analysis of diverse *Chlamydia trachomatis* strains identifies phylogenetic relationships masked by current clinical typing. *Nature genetics*. 2012; 44(4):413–9. <https://doi.org/10.1038/ng.2214> PMID: 22406642
14. Read TD, Joseph SJ, Didelot X, Liang B, Patel L, Dean D. Comparative analysis of *Chlamydia psittaci* genomes reveals the recent emergence of a pathogenic lineage with a broad host range. *MBio*. 2013; 4(2):e00604–12. <https://doi.org/10.1128/mBio.00604-12> PMID: 23532978

15. Pál C, Papp B, Lercher MJ. Adaptive evolution of bacterial metabolic networks by horizontal gene transfer. *Nature genetics*. 2005; 37(12):1372–5. <https://doi.org/10.1038/ng1686> PMID: 16311593
16. Polz MF, Alm EJ, Hanage WP. Horizontal gene transfer and the evolution of bacterial and archaeal population structure. *Trends in Genetics*. 2013; 29(3):170–5. <https://doi.org/10.1016/j.tig.2012.12.006> PMID: 23332119
17. Jeong H, Sung S, Kwon T, Seo M, Caetano-Anollés K, Choi SH, et al. HGTree: database of horizontally transferred genes determined by tree reconciliation. *Nucleic acids research*. 2015:gkv1245.
18. Stamatakis A. RAxML version 8: a tool for phylogenetic analysis and post-analysis of large phylogenies. *Bioinformatics*. 2014; 30(9):1312–3. <https://doi.org/10.1093/bioinformatics/btu033> PMID: 24451623
19. Kordi M, Bansal MS. Exact algorithms for duplication-transfer-loss reconciliation with non-binary gene trees. *IEEE/ACM transactions on computational biology and bioinformatics*. 2017.
20. Sennblad B, Lagergren J. Probabilistic orthology analysis. *Systematic biology*. 2009; 58(4):411–24. <https://doi.org/10.1093/sysbio/syp046> PMID: 20525594
21. Finn RD, Clements J, Eddy SR. HMMER web server: interactive sequence similarity searching. *Nucleic acids research*. 2011:gkr367.
22. Lagesen K, Hallin P, Rødland E, Stærfeldt H, Rognes T, Ussery D. RNAMmer: consistent annotation of rRNA genes in genomic sequences. *Nucleic Acids Res*. 2007; 35(9):3100–8. <https://doi.org/10.1093/nar/gkm160> PMID: 17452365
23. Kim KM, Sung S, Caetano-Anollés G, Han JY, Kim H. An approach of orthology detection from homologous sequences under minimum evolution. *Nucleic acids research*. 2008; 36(17):e110–e. <https://doi.org/10.1093/nar/gkn485> PMID: 18676448
24. Sievers F, Wilm A, Dineen D, Gibson TJ, Karplus K, Li W, et al. Fast, scalable generation of high-quality protein multiple sequence alignments using Clustal Omega. *Molecular systems biology*. 2011; 7(1):539.
25. Junier T, Zdobnov EM. The Newick utilities: high-throughput phylogenetic tree processing in the UNIX shell. *Bioinformatics*. 2010; 26(13):1669–70. <https://doi.org/10.1093/bioinformatics/btq243> PMID: 20472542
26. Tatusov RL, Fedorova ND, Jackson JD, Jacobs AR, Kiryutin B, Koonin EV, et al. The COG database: an updated version includes eukaryotes. *BMC bioinformatics*. 2003; 4(1):41.
27. Bose T, Haque MM, Reddy C, Mande SS. COGNIZER: a framework for functional annotation of metagenomic datasets. *PloS one*. 2015; 10(11):e0142102. <https://doi.org/10.1371/journal.pone.0142102> PMID: 26561344
28. Letunic I, Bork P. Interactive tree of life (iTOL) v3: an online tool for the display and annotation of phylogenetic and other trees. *Nucleic Acids Res*. 2016; 44(W1):W242–5. Epub 2016/04/21. <https://doi.org/10.1093/nar/gkw290> PMID: 27095192; PubMed Central PMCID: PMC4987883.
29. Borel N, Leonard C, Slade J, Schoborg RV. Chlamydial antibiotic resistance and treatment failure in veterinary and human medicine. *Current clinical microbiology reports*. 2016; 3(1):10–8.
30. Yeruva L, Spencer N, Bowlin AK, Wang Y, Rank RG. Chlamydial infection of the gastrointestinal tract: a reservoir for persistent infection. *Pathogens and disease*. 2013; 68(3):88–95. Epub 2013/07/12. <https://doi.org/10.1111/2049-632X.12052> PMID: 23843274; PubMed Central PMCID: PMC3751173.
31. Stecher B, Maier L, Hardt W-D. 'Blooming' in the gut: how dysbiosis might contribute to pathogen evolution. *Nature Reviews Microbiology*. 2013; 11(4):277–84. <https://doi.org/10.1038/nrmicro2989> PMID: 23474681
32. Corsaro D, Venditti D, Valassina M. New chlamydial lineages from freshwater samples. *Microbiology (Reading, England)*. 2002; 148(Pt 2):343–4. Epub 2002/02/08. <https://doi.org/10.1099/00221287-148-2-343> PMID: 11832497.
33. Horn M, Wagner M. Evidence for additional genus-level diversity of Chlamydiales in the environment. *FEMS microbiology letters*. 2001; 204(1):71–4. PMID: 11682181
34. Soucy SM, Huang J, Gogarten JP. Horizontal gene transfer: building the web of life. *Nature Reviews Genetics*. 2015; 16(8):472–82. <https://doi.org/10.1038/nrg3962> PMID: 26184597
35. Lawrence JG, Hendrickson H. Genome evolution in bacteria: order beneath chaos. *Current opinion in microbiology*. 2005; 8(5):572–8. <https://doi.org/10.1016/j.mib.2005.08.005> PMID: 16122972
36. Longbottom D, Coulter L. Animal chlamydioses and zoonotic implications. *Journal of comparative pathology*. 2003; 128(4):217–44. PMID: 12834606
37. Beaber JW, Hochhut B, Waldor MK. SOS response promotes horizontal dissemination of antibiotic resistance genes. *Nature*. 2004; 427(6969):72–4. <https://doi.org/10.1038/nature02241> PMID: 14688795
38. Jeffrey BM, Suchland RJ, Eriksen SG, Sandoz KM, Rockey DD. Genomic and phenotypic characterization of in vitro-generated *Chlamydia trachomatis* recombinants. *BMC microbiology*. 2013; 13(1):142.

39. Denamur E, Lecointre G, Darlu P, Tenaillon O, Acquaviva C, Sayada C, et al. Evolutionary implications of the frequent horizontal transfer of mismatch repair genes. *Cell*. 2000; 103(5):711–21. Epub 2000/12/15. PMID: [11114328](#).
40. Cohen E, Kessler DA, Levine H. Recombination dramatically speeds up evolution of finite populations. *Physical review letters*. 2005; 94(9):098102. Epub 2005/03/24. <https://doi.org/10.1103/PhysRevLett.94.098102> PMID: [15784005](#).
41. Raz Y, Tannenbaum E. The influence of horizontal gene transfer on the mean fitness of unicellular populations in static environments. *Genetics*. 2010; 185(1):327–37. <https://doi.org/10.1534/genetics.109.113613> PMID: [20194966](#)
42. Nunes A, Gomes JP. Evolution, phylogeny, and molecular epidemiology of Chlamydia. *Infection, genetics and evolution: journal of molecular epidemiology and evolutionary genetics in infectious diseases*. 2014; 23:49–64. Epub 2014/02/11. <https://doi.org/10.1016/j.meegid.2014.01.029> PMID: [24509351](#).
43. Roulis E, Polkinghorne A, Timms P. Chlamydia pneumoniae: modern insights into an ancient pathogen. *Trends in microbiology*. 2013; 21(3):120–8. <https://doi.org/10.1016/j.tim.2012.10.009> PMID: [23218799](#)
44. Mariotti SP, Pascolini D, Rose-Nussbaumer J. Trachoma: global magnitude of a preventable cause of blindness. *British Journal of Ophthalmology*. 2009; 93(5):563–8. <https://doi.org/10.1136/bjo.2008.148494> PMID: [19098034](#)
45. Bennett JE, Dolin R, Blaser MJ. Principles and practice of infectious diseases: Elsevier Health Sciences; 2014.
46. Caro-Quintero A, Konstantinidis KT. Inter-phylum HGT has shaped the metabolism of many mesophilic and anaerobic bacteria. *The ISME journal*. 2015; 9(4):958–67. <https://doi.org/10.1038/ismej.2014.193> PMID: [25314320](#)
47. Cohen O, Gophna U, Pupko T. The complexity hypothesis revisited: connectivity rather than function constitutes a barrier to horizontal gene transfer. *Molecular biology and evolution*. 2011; 28(4):1481–9. <https://doi.org/10.1093/molbev/msq333> PMID: [21149642](#)
48. Jain R, Rivera MC, Lake JA. Horizontal gene transfer among genomes: the complexity hypothesis. *Proceedings of the National Academy of Sciences*. 1999; 96(7):3801–6.
49. Suchland R, Sandoz KM, Jeffrey B, Stamm W, Rockey D. Horizontal transfer of tetracycline resistance among Chlamydia spp. in vitro. *Antimicrobial agents and chemotherapy*. 2009; 53(11):4604–11. <https://doi.org/10.1128/AAC.00477-09> PMID: [19687238](#)
50. Jelocnik M, Bachmann NL, Kaltenboeck B, Waugh C, Woolford L, Speight KN, et al. Genetic diversity in the plasticity zone and the presence of the chlamydial plasmid differentiates Chlamydia pecorum strains from pigs, sheep, cattle, and koalas. *BMC genomics*. 2015; 16(1):893.
51. Taylor LD, Nelson DE, Dorward DW, Whitmire WM, Caldwell HD. Biological characterization of Chlamydia trachomatis plasticity zone MACPF domain family protein CT153. *Infection and immunity*. 2010; 78(6):2691–9. <https://doi.org/10.1128/IAI.01455-09> PMID: [20351143](#)
52. Beatty WL, Belanger TA, Desai AA, Morrison RP, Byrne GI. Tryptophan depletion as a mechanism of gamma interferon-mediated chlamydial persistence. *Infection and immunity*. 1994; 62(9):3705–11. PMID: [8063385](#)
53. Fehlner-Gardiner C, Roshick C, Carlson JH, Hughes S, Belland RJ, Caldwell HD, et al. Molecular basis defining human Chlamydia trachomatis tissue tropism A possible role for tryptophan synthase. *Journal of Biological Chemistry*. 2002; 277(30):26893–903. <https://doi.org/10.1074/jbc.M203937200> PMID: [12011099](#)
54. Cenci U, Ducatez M, Kadouche D, Colleoni C, Ball SG. Was the Chlamydial adaptative strategy to tryptophan starvation an early determinant of plastid endosymbiosis? *Frontiers in Cellular and Infection Microbiology*. 2016;6.
55. Betts-Hampikian HJ, Fields KA. The chlamydial type III secretion mechanism: revealing cracks in a tough nut. *The obligate intracellular lifestyle*. 2010: 71.
56. Joseph SJ, Didelot X, Rothschild J, de Vries HJ, Morr e SA, Read TD, et al. Population genomics of Chlamydia trachomatis: insights on drift, selection, recombination, and population structure. *Molecular biology and evolution*. 2012:mss198.
57. Ribet D, Cossart P. How bacterial pathogens colonize their hosts and invade deeper tissues. *Microbes and Infection*. 2015; 17(3):173–83. <https://doi.org/10.1016/j.micinf.2015.01.004> PMID: [25637951](#)
